# Supplementary material for: An insulin-sensing sugar-based fluorescent hydrogel
Source: Royal Society of Chemistry journal article supplement (doi:10.1039/b516632b), 2006-01-01
Supplement: b516632b.pdf [file b516632b.pdf]

## Supplementary Information

### An insulin-sensing sugar-based fluorescent hydrogel

Sankarprasad Bhuniya and Byeang Hyeon Kim\*

*National Research Laboratory, Department of Chemistry, Division of Molecular and Life  
Science,*

*Pohang University of Science and Technology, Pohang 790-784, Korea*

[bhkim@postech.ac.kr](mailto:bhkim@postech.ac.kr)

#### Contents

- General experimental information ....S2
- Sample preparation and tests for gelation ....S2
- Synthesis of hydrogelators ....S2
- FTIR Spectra of hydrogelators ....S7
- Fluorescence spectra of hydrogelators ....S8
- Photographic images of hydrogelator **4b** under UV light  
i) in the presence and ii) absence of insulin ....S8
- Sample preparation and fluorescence study in the presence of insulin ....S8
- Fluorescence spectra of hydrogelator **5d** in presence of insulin ....S9

## Experimental

### General Information

All chemicals were obtained from Aldrich Chemical Company and were used without further purification. Each reaction was executed under an inert atmosphere of dry argon using glassware that was flame-dried under vacuum. Flash chromatography was performed using silica gel 60 (230–400 mesh; ASTM). Melting points are uncorrected and were obtained using an Electrothermal 1A 9000 series apparatus. FTIR spectra were recorded on a Bruker PS55+ FT-IR spectrometer. Low-resolution FAB<sup>+</sup> mass spectra were obtained using a JEOL JMS-AX505WA (FAB-HRMS) spectrometer. <sup>1</sup>H and <sup>13</sup>C NMR spectra were recorded using a Bruker Aspect 300 NMR spectrometer. Chemical shifts are reported in parts per million (ppm) downfield relative to the internal standard, tetramethylsilane (TMS). Coupling constants are reported in hertz (Hz). Spectral splitting patterns are designated as s, singlet; d, doublet; dd, double doublet; dt, distorted triplet; t, triplet; m, multiplet; and br, broad. SEM images were obtained using a Philips XL30S FEG SEM analyzer. Fluorescence spectra was recorded using an MD-5020-PTI analyser.

**Sample Preparation and Tests for Gelation.** To avoid evaporation of the liquid components, for most studies the gels were prepared in sealed 5-mm (i.d.) glass tubes. Weighed quantities of a gelator and a liquid were heated until dissolution occurred. The tubes were then maintained at room temperature for 2–5 min. We deemed the samples to be gels if (a) they were not visually phase-separated and (b) did not flow perceptibly when the vessels were inverted.

### Synthesis of hydrogelators:

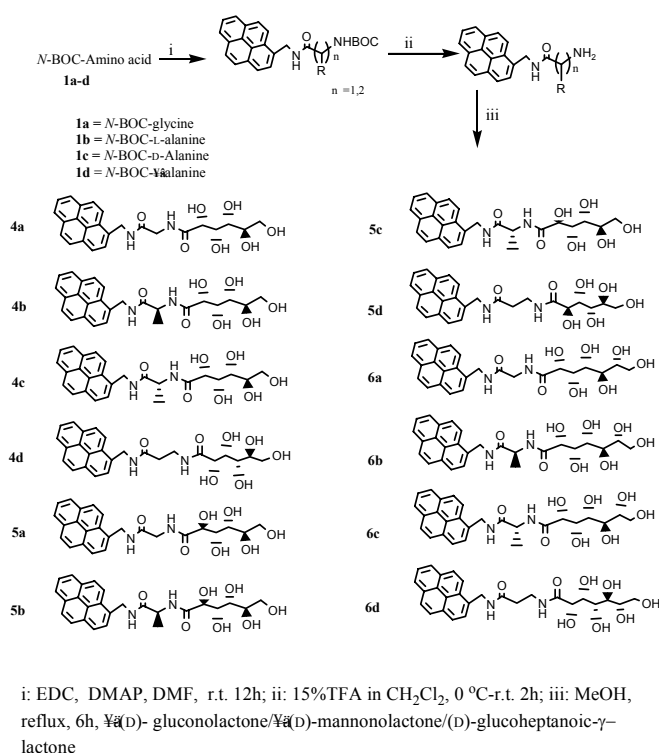

## Synthesis of Gelators 4a–d

### General procedures:

An *N*-BOC amino acid (1 mmol), 1-(3-dimethylaminopropyl)-3-ethylcarbodiimide·HCl (EDC; 191 mg, 1 mmol), and *N,N*-dimethyl-4-aminopyridine (DMAP; 122 mg, 1 mmol) were dissolved in dry DMF (25 mL) and placed in a two-neck round-bottom flask equipped with an argon gas inlet. 1-Pyrenemethylamine hydrochloride (268 mg, 1 mmol) was added and then the mixture was stirred for 12 h. When the reaction was complete, the mixture was poured into water and extracted with CH<sub>2</sub>Cl<sub>2</sub>. The product was isolated and purified by column chromatography (SiO<sub>2</sub>; hexane/EtOAc, 80:20). Product yields: **1a**, 320 mg (72%); **1b**, 350 mg (81%); **1c**, 362 mg (82%); **1d**, 344 mg (71%).

Compound **2** was placed in a two-neck round-bottom flask, a 15% solution of trifluoroacetic acid in dichloromethane (10 ml) was added, and then the reaction was continued for 2 h at room temperature. The product was isolated and purified by column chromatography (SiO<sub>2</sub>; CH<sub>2</sub>Cl<sub>2</sub>/MeOH, 85/15). Yields: **3a**, 265 mg (92%); **3b**, 280 mg (91%); **3c**, 285 mg (97%); **3d**, 285 mg (97%).

Compound **3** (1 mmol) was placed in a round-bottom flask, a solution of δ-D-gluconolactone in methanol (1 mmol, 30 mL) was added, and then the mixture was heated under reflux for 6 h. After cooling the reaction mixture, a white product separated out; it was washed with methanol repeatedly and then dried under vacuum. **4a**: 265 mg (60%); m.p. 219 °C; **4b**: 275 mg (65%); m.p. 208 °C; **4c**: 260 mg (56%); m.p. 199 °C; **4d**: 280 mg (67%); m.p. 202 °C.

***N*-D-Gluconyl-*N'*-1-pyrenemethylglycinamide (4a)**: <sup>1</sup>H NMR (300 MHz, DMSO-d<sub>6</sub>): 8.57 (s, 1H; NH), 8.44 (d, *J* = 7.20 Hz, 2H; ArH), 8.32 (m, 1H; ArH), 8.27 (d, *J* = 3.20 Hz, 4H; ArH), 8.17 (s, 1H; NH), 8.07 (d, *J* = 4.00 Hz, 2H; ArH), 5.62 (d, *J* = 3.01 Hz, 1H; CH), 5.01 (d, *J* = 3.67 Hz, 2H; CH<sub>2</sub>), 4.64 (dt, *J* = 3.61 Hz, 1H; CH), 4.42 (d, *J* = 3.34 Hz, 1H; CH), 3.89 (m, 1H; CH), 3.84 (dd, *J* = 6.01 Hz, *J*<sub>gem</sub> = 11.2 Hz, 2H; CH<sub>2</sub>), 3.34 (d, *J* = 5.56 Hz, 2H; CH<sub>2</sub>). <sup>13</sup>C NMR (75.5 MHz, DMSO-d<sub>6</sub>): δ 174.09, 169.72, 133.51, 131.63, 131.14, 130.89, 128.79, 128.43, 128.23, 127.84, 127.27, 127.08, 126.07, 125.99, 125.56, 124.82, 124.76, 123.97, 74.02, 72.32, 71.43, 64.17, 42.88. HRMS-FAB (*m/z*): [M + Na]<sup>+</sup> Calcd. for C<sub>25</sub>H<sub>26</sub>N<sub>2</sub>O<sub>7</sub>Na: 489.4804; Found: 489.4816. Anal. Calcd. for C<sub>25</sub>H<sub>26</sub>N<sub>2</sub>O<sub>7</sub>:

***N*-D-Gluconyl-*N'*-1-pyrenemethyl-L-alaninamide (4b)**: <sup>1</sup>H NMR (300 MHz, DMSO-d<sub>6</sub>): 8.50 (s, 1H; NH), 8.40 (d, *J* = 7.20 Hz, 2H; ArH), 8.22 (m, 1H; ArH), 8.07 (d, *J* = 3.20 Hz, 4H; ArH), 7.98 (s, 1H; NH), 7.88 (d, *J* = 4.00 Hz, 2H; ArH), 5.56 (d, *J* = 3.62 Hz, 1H; CH), 5.05 (s, 2H; CH<sub>2</sub>), 4.59 (d, *J* = 3.62 Hz, 1H; CH), 4.39 (d, *J* = 3.34 Hz, 1H; CH), 4.05 (m, 1H; CH), 3.52 (q, 1H; CH), 3.37 (dd, *J* = 6.11 Hz, *J*<sub>gem</sub> = 11.2 Hz, 2H; CH<sub>2</sub>), 1.30 (d, *J* = 5.6 Hz, 3H; CH<sub>3</sub>). <sup>13</sup>C NMR (75.5 MHz, DMSO-d<sub>6</sub>): δ 174.09, 169.72, 133.51, 131.63, 131.14, 130.89, 128.79, 128.43, 128.23, 127.84, 127.27, 127.08, 126.07, 125.99, 125.56, 124.82, 124.76, 123.97, 74.02, 72.32,

71.43, 64.17, 48.46, 19.52. HRMS-FAB ( $m/z$ ):  $[M + Na]^+$  Calcd. for  $C_{26}H_{28}N_2O_7Na$ : 503.5073; Found: 503.5086. Anal. Calcd. for  $C_{26}H_{28}N_2O_7$ :

***N-D-Gluconyl-N'-(1-pyrene)methyl-D-alaninamide (4c)***:  $^1H$  NMR (300 MHz, DMSO- $d_6$ ): 8.60 (s, 1H; NH), 8.55 (d,  $J = 7.27$  Hz, 2H; ArH), 8.29 (m, 1H; ArH), 8.17 (d,  $J = 3.60$  Hz, 4H; ArH), 8.09 (s, 1H; NH), 7.98 (d,  $J = 4.10$  Hz, 2H; ArH), 5.56 (d,  $J = 3.69$  Hz, 1H; CH), 5.15 (s, 2H; CH<sub>2</sub>), 4.69 (d,  $J = 3.72$  Hz, 1H; CH), 4.49 (d,  $J = 3.30$  Hz, 1H; CH), 4.15 (m, 1H; CH), 3.72 (q, 1H; CH), 3.57 (dd,  $J = 6.11$  Hz,  $J_{gem} = 11.2$  Hz, 2H; CH<sub>2</sub>), 1.37 (d,  $J = 5.6$  Hz, 3H; CH<sub>3</sub>).  $^{13}C$  NMR (75 MHz, DMSO- $d_6$ ):  $\delta$  174.09, 169.72, 133.51, 131.63, 131.14, 130.89, 128.79, 128.43, 128.23, 127.84, 127.27, 127.08, 126.07, 125.99, 125.56, 124.82, 124.76, 123.97, 74.02, 72.32, 71.43, 64.17, 48.46, 18.74. HRMS-FAB ( $m/z$ ):  $[M + Na]^+$  Calcd. for  $C_{26}H_{28}N_2O_7Na$ : 503.5073; Found: 503.5086.

***N-D-Gluconyl-N'-1-pyrenemethyl- $\beta$ -alaninamide (4d)***:  $^1H$  NMR (300 MHz, DMSO- $d_6$ ): 8.57 (s, 1H; NH), 8.44 (d,  $J = 7.20$  Hz, 2H; ArH), 8.32 (m, 1H; ArH), 8.27 (d,  $J = 3.20$  Hz, 4H; ArH), 8.17 (s, 1H; NH), 8.07 (d,  $J = 4.00$  Hz, 2H; ArH), 5.6 (d,  $J = 5.01$  Hz, 2H; CH), 5.15 (s, 2H; CH<sub>2</sub>), 4.70 (d,  $J = 3.67$  Hz, 1H; CH), 4.42 (d,  $J = 3.34$  Hz, 1H; CH), 3.80 (m, 1H; CH), 3.74 (dd,  $J = 6.01$  Hz,  $J_{gem} = 11.2$  Hz, 2H; CH<sub>2</sub>), 3.50 (t,  $J = 7.26$  Hz, 2H; CH<sub>2</sub>), 2.39 (t,  $J = 6.21$  Hz, 2H; CH<sub>2</sub>).  $^{13}C$  NMR (75 MHz, DMSO- $d_6$ ): 172.76, 170.92, 133.13, 131.10, 130.63, 130.41, 128.38, 127.71, 172.34, 126.97, 126.58, 125.50, 125.09, 124.24, 123.50, 73.79, 72.60, 71.82, 70.43, 63.68, 35.42, 35.37. HRMS-FAB ( $m/z$ ):  $[M + Na]^+$  Calcd. for  $C_{26}H_{28}N_2O_7Na$ : 503.5073; Found: 503.5086.

**Synthesis of Gelators 5a–d**: The procedures for the synthesis of gelators **5a–d** are same as those described for the synthesis of **4a–d**. **5a**: 255 mg, 58%; m.p. 216 °C; **5b**: 278 mg (65%); m.p. 189 °C; **5c**: 269 mg (56%); m.p. 206 °C; **5d**: 282 mg (67.2%); m.p. 186 °C.

***N-(D)-Mannonyl-N'-1-pyrenemethylglycinamide (5a)***:  $^1H$  NMR (300 MHz, DMSO- $d_6$ ): 8.590 (d,  $J = 7.20$  Hz, 2H; ArH), 8.57 (m, 1H; ArH), 8.41 (d,  $J = 3.20$  Hz, 4H; ArH), 8.31 (s, 1H; NH), 8.08 (d,  $J = 4.00$  Hz, 2H; ArH), 5.56 (d,  $J = 5.57$  Hz, 1H; CH), 5.06 (d,  $J = 6.01$  Hz, 2H; CH<sub>2</sub>), 4.69 (d,  $J = 3.2$  Hz, 1H; CH), 4.54 (d,  $J = 5.23$  Hz, 1H; CH), 4.40 (dt,  $J = 6.01$  Hz, 1H; CH), 3.97 (m, 2H; CH<sub>2</sub>); 3.58 (d,  $J = 3.10$  Hz, 2H; CH<sub>2</sub>).  $^{13}C$  NMR (75 MHz, DMSO- $d_6$ ):  $\delta$  174.09, 169.72, 133.51, 131.63, 131.14, 130.89, 128.79, 128.43, 128.23, 127.84, 127.27, 127.08, 126.07, 125.99, 125.56, 124.82, 124.76, 123.97, 74.02, 72.32, 71.43, 64.17, 42.88. HRMS-FAB ( $m/z$ ):  $[M + Na]^+$  Calcd. for  $C_{25}H_{26}N_2O_7Na$ : 489.4804; Found: 489.4816.

***N-D-Mannonyl-N'-1-pyrenemethyl-D-alaninamide (5b)***:  $^1H$  NMR (300 MHz, DMSO- $d_6$ ): 8.70 (s, 1H; NH), 8.48 (d,  $J = 7.27$  Hz, 2H; ArH), 8.39 (m, 1H; ArH), 8.27 (d,  $J = 3.60$  Hz, 4H; ArH), 8.19 (s, 1H; NH), 7.90 (d,  $J = 4.10$  Hz, 2H; ArH), 5.47 (d,  $J = 5.2$  Hz, 1H; CH), 5.08 (d,  $J = 5.41$  Hz, 2H; CH<sub>2</sub>), 4.67 (d,  $J = 3.67$  Hz, 1H; CH), 4.54 (m, H; CH), 4.42 (dt,  $J = 4.52$  Hz, 1H; CH), 3.89 (m, 1H; CH), 3.52 (d,  $J = 6.37$  Hz, 2H; CH<sub>2</sub>), 1.30 (d,  $J = 6.2$  Hz, 3H; CH<sub>3</sub>).  $^{13}C$

NMR (75 MHz, DMSO- $d_6$ ): 174.09, 169.72, 133.51, 131.63, 131.14, 130.89, 128.79, 128.43, 128.23, 127.84, 127.27, 127.08, 126.07, 125.99, 125.56, 124.82, 124.76, 123.97, 74.02, 72.32, 71.43, 64.17, 48.46, 19.52. HRMS-FAB ( $m/z$ ):  $[M + Na]^+$  Calcd. for  $C_{26}H_{28}N_2O_7Na$ : 503.5073; Found: 503.5086.

***N-D-Mannonyl-N'-1-pyrenemethyl-L-alaninamide (5c)***:  $^1H$  NMR (300 MHz, DMSO- $d_6$ ): 8.70 (s, 1H; NH), 8.34 (d,  $J = 7.27$  Hz, 2H; ArH), 8.30 (m, 1H; ArH), 8.25 (d,  $J = 3.60$  Hz, 4H; ArH), 8.16 (s, 1H; NH), 8.04 (d,  $J = 4.10$  Hz, 2H; ArH), 5.47 (d,  $J = 5.2$  Hz, 1H; CH), 5.08 (d,  $J = 5.41$  Hz, 2H; CH $_2$ ), 4.67 (d,  $J = 3.67$  Hz, 1H; CH), 4.54 (m, 1H; CH), 4.40 (dt,  $J = 4.52$  Hz, 1H; CH), 3.63 (m, 1H; CH), 3.52 (d,  $J = 6.37$  Hz, 2H; CH $_2$ ), 1.33 (d,  $J = 6.2$  Hz, 3H; CH $_3$ ).  $^{13}C$  NMR (75.5 MHz, DMSO- $d_6$ ): 174.09, 169.72, 133.51, 131.63, 131.14, 130.89, 128.79, 128.43, 128.23, 127.84, 127.27, 127.08, 126.07, 125.99, 125.56, 124.82, 124.76, 123.97, 74.02, 72.32, 71.43, 64.17, 48.46, 18.74. HRMS-FAB ( $m/z$ ):  $[M + Na]^+$  Calcd. for  $C_{26}H_{28}N_2O_7Na$ : 503.5073; Found: 503.5086.

***N-D-Mannonyl-N'-1-pyrenemethyl-β-alaninamide (5d)***:  $^1H$  NMR (300 MHz, DMSO- $d_6$ ): 8.47 (s, 1H; NH), 8.34 (d,  $J = 7.20$  Hz, 2H; ArH), 8.22 (m, 1H; ArH), 8.17 (d,  $J = 3.20$  Hz, 4H; ArH), 7.8 (s, 1H; NH), 5.49 (d,  $J = 2.3$  Hz, 1H; CH), 5.03 (d,  $J = 5.4$  Hz, 2H; CH $_2$ ), 4.56 (d,  $J = 2$  Hz, 1H; CH), 4.48 (d, 1H,  $J = 5.87$  Hz, 1H; CH), 4.38 (t,  $J = 4.5$  Hz, 2H; CH $_2$ ), 4.03 (m, 1H; CH), 3.96 (m, 1H; CH), 3.62 (m, 1H; CH), 3.35 (dt,  $J = 3.2$  Hz, 2H; CH $_2$ ), 2.42 (t,  $J = 6.7$  Hz, 2H; CH $_2$ ).  $^{13}C$  NMR (75 MHz, DMSO- $d_6$ ):  $\delta$  172.76, 170.92, 133.13, 131.10, 130.63, 130.41, 128.38, 127.71, 172.34, 126.97, 126.58, 125.50, 125.09, 124.24, 123.50, 73.79, 72.60, 71.82, 70.43, 63.68, 35.482, 35.39. HRMS-FAB ( $m/z$ ):  $[M + Na]^+$  Calcd. for  $C_{26}H_{28}N_2O_7Na$ : 503.5073; Found: 503.5086.

**Synthesis of Gelators 6a–d**: The procedures for the synthesis of gelators **6a–d** are the same as those described for **4a–d**. **5a**: 275 mg (58%), m.p. 209 °C; **6b**: 298 mg (65%), m.p. 181 °C; **6c**: 289 mg (56%), m.p. 192 °C; **6d**: 300 mg (67.2%), m.p. 180 °C.

***N-D-Heptagluconyl-N'-1-pyrenemethylglycinamide (6a)***:  $^1H$  NMR (300 MHz, DMSO- $d_6$ ): 8.17 (s, 1H; NH), 8.04 (d,  $J = 7.20$  Hz, 2H; ArH), 8.02 (m, 1H; ArH), 7.97 (d,  $J = 3.20$  Hz, 4H; ArH), 7.88 (s, 1H; NH), 7.77 (d,  $J = 4.00$  Hz, 2H; ArH), 5.08 (s, 2H; CH $_2$ ), 4.73 (d,  $J = 3.6$  Hz, 1H; CH), 4.44 (m, 1H; CH), 4.21 (m, 1H; CH), 3.89 (dt,  $J = 1.2$  Hz, 1H; CH), 3.58 (d,  $J = 2.5$  Hz, 2H; CH $_2$ ), 3.42 (d,  $J = 2.5$  Hz, 1H; CH), 3.36 (d,  $J = 6.37$  Hz, 2H; CH $_2$ ).  $^{13}C$  NMR (75.5 MHz, DMSO- $d_6$ ):  $\delta$  173.09, 169.92, 133.51, 131.63, 131.14, 130.89, 128.79, 128.43, 128.23, 127.84, 127.27, 127.08, 126.07, 125.99, 125.56, 124.82, 124.76, 123.97, 74.02, 72.32, 71.43, 64.17, 42.88. HRMS-FAB ( $m/z$ ):  $[M + Na]^+$  Calcd. for  $C_{26}H_{28}N_2O_8Na$ : 519.5067; Found: 519.5079.

***N-D-Heptagluconyl-N'-1-pyrenemethyl-D-alaninamide (6b)***:  $^1H$  NMR (300 MHz, DMSO- $d_6$ ): 8.21 (s, 1H; NH), 8.14 (d,  $J = 7.20$  Hz, 2H; ArH), 8.09 (m, 1H; ArH), 8.00 (d,  $J = 3.20$  Hz,

4H; ArH), 7.92 (s, 1H; NH), 7.87 (d,  $J = 4.00$  Hz, 2H; ArH), 5.68 (d,  $J = 3.5$  Hz, 1H; CH), 5.08 (d,  $J = 4.5$  Hz, 2H; CH<sub>2</sub>), 4.73 (d,  $J = 3.71$  Hz, 1H; CH), 4.54 (m, 1H; CH), 4.42 (m, 1H; CH), 4.11 (dt, 1H; CH), 3.89 (m, 1H; CH), 3.52 (d,  $J = 6.37$  Hz, 1H; CH<sub>2</sub>), 1.30 (d,  $J = 6.2$  Hz, 3H; CH<sub>3</sub>). <sup>13</sup>C NMR (75.5 MHz, DMSO-d<sub>6</sub>): 174.09, 169.72, 133.51, 131.63, 131.14, 130.89, 128.79, 128.43, 128.23, 127.84, 127.27, 127.08, 126.07, 125.99, 125.56, 124.82, 124.76, 123.97, 74.02, 72.32, 71.43, 64.17, 48.46, 19.52. HRMS-FAB ( $m/z$ ): [M + Na]<sup>+</sup> Calcd. for C<sub>27</sub>H<sub>30</sub>N<sub>2</sub>O<sub>8</sub>Na: 533.5336; Found: 533.5349.

***N-D-Heptagluconyl-N'-1-pyrenemethyl-L-alaninamide (6c)***: <sup>1</sup>H NMR (300 MHz, DMSO-d<sub>6</sub>): 8.31 (s, 1H; NH), 8.24 (d,  $J = 7.20$  Hz, 2H; ArH), 8.19 (m, 1H; ArH), 8.09 (d,  $J = 3.20$  Hz, 4H; ArH), 8.02 (s, 1H; NH), 7.92 (d,  $J = 4.00$  Hz, 2H; ArH), 5.58 (d,  $J = 3.5$  Hz, 1H; CH), 5.03 (d,  $J = 4.5$  Hz, 2H; CH<sub>2</sub>), 4.70 (d,  $J = 3.71$  Hz, 1H; CH), 4.65 (m, 1H; CH), 4.51 (m, 1H; CH), 4.32 (m, 1H; CH), 4.01 (dt, 1H; CH), 3.81 (m, 1H; CH), 3.50 (d,  $J = 6.37$  Hz, 1H; CH<sub>2</sub>), 1.33 (d,  $J = 6.2$  Hz, 3H; CH<sub>3</sub>). <sup>13</sup>C NMR (75.5 MHz, DMSO-d<sub>6</sub>): δ 174.09, 169.72, 133.51, 131.63, 131.14, 130.89, 128.79, 128.43, 128.23, 127.84, 127.27, 127.08, 126.07, 125.99, 125.56, 124.82, 124.76, 123.97, 74.02, 72.32, 71.43, 64.17, 48.46, 18.74. HRMS-FAB ( $m/z$ ): [M + Na]<sup>+</sup> Calcd. for C<sub>27</sub>H<sub>30</sub>N<sub>2</sub>O<sub>8</sub>Na: 533.5336; Found: 533.5349.

***N-D-Heptagluconyl-N'-1-pyrenemethyl-β-alaninamide(6d)***: <sup>1</sup>H NMR (300 MHz, DMSO-d<sub>6</sub>): 8.65 (s, 1H; NH), 8.38 (d,  $J = 7.20$  Hz, 2H; ArH), 8.28 (m, 1H; ArH), 8.11 (d,  $J = 3.20$  Hz, 4H; ArH), 7.8 (s, 1H; NH), 5.69 (d, 1H,  $J = 2.3$  Hz; CH), 5.06 (d,  $J = 5.4$  Hz, 2H; CH<sub>2</sub>), 4.58 (d,  $J = 3.7$  Hz; CH), 4.48 (d,  $J = 5.87$  Hz; CH), 4.38 (t,  $J = 2.87$  Hz, 1H; CH), 4.03 (m, 1H; CH), 3.96 (m, 1H; CH), 3.62 (m, 1H; CH), 3.35 (d,  $J = 3.2$  Hz, 2H; CH<sub>2</sub>), 2.43 (t,  $J = 7.2$  Hz, 2H; CH<sub>2</sub>), 2.41 (t,  $J = 7.2$  Hz, 2H; CH<sub>2</sub>). <sup>13</sup>C NMR (75 MHz, DMSO-d<sub>6</sub>): δ 173.56, 170.82, 133.13, 131.10, 130.63, 130.41, 128.38, 127.71, 172.34, 126.97, 126.58, 125.50, 125.09, 124.24, 123.50, 73.79, 72.60, 71.82, 70.43, 63.68, 35.48, 35.39. HRMS-FAB ( $m/z$ ): [M + Na]<sup>+</sup> Calcd. for C<sub>27</sub>H<sub>30</sub>N<sub>2</sub>O<sub>8</sub>Na: 533.5336; Found: 533.5349.

## FTIR Spectra of hydrogelators in their solid amorphous and xerogel states.

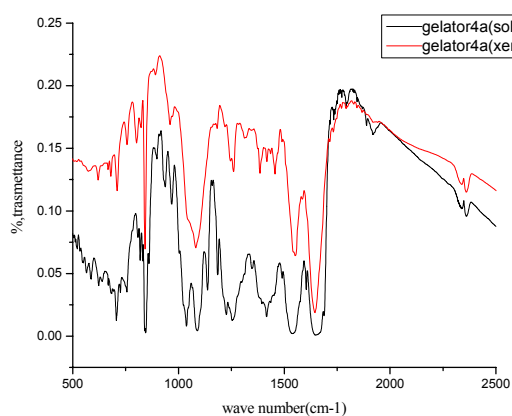

Figure S1

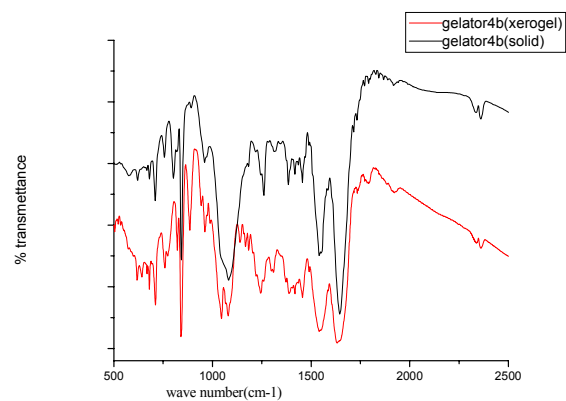

Figure S2

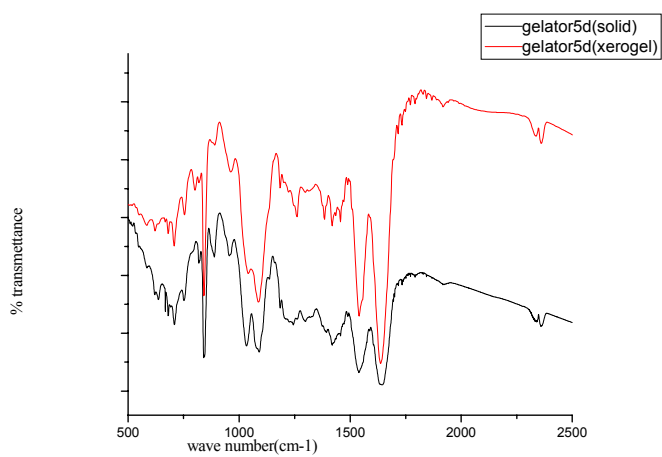

Figure S3

### Fluorescence spectra of hydrogelators

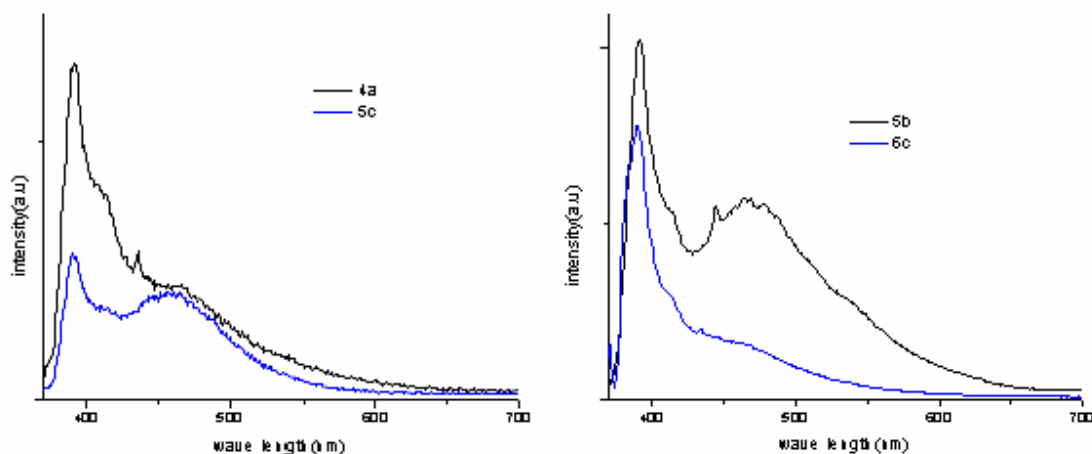

Figure S4: Fluorescence spectra ( $\lambda_{\text{ex}} = 380 \text{ nm}$ ) of hydrogelators at their gel states.

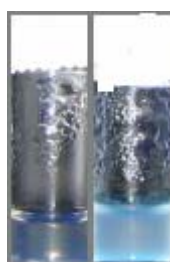

(A) (B)

Figure S5: Hydrogel of gelator **4b** in (A) the absence and (B) in the presence of insulin ( $5 \mu\text{g}$ ).

#### Measurement of fluorescence spectra of insulin-containing gelators:

Gelator **4b** (3mg) or **5d** (1.4 mg) was dissolved in distilled water (2 ml) upon heating at  $100 \text{ }^\circ\text{C}$ . The solution was transferred immediately to the fluorescence cell containing different doses of insulin ( $1\text{--}5 \mu\text{g}$ ) and then maintained at room temperature for 10 min to complete the gelation process. Finally, the emission spectra were recorded after exciting the sample at  $\lambda_{\text{max}} 370 \text{ nm}$ .



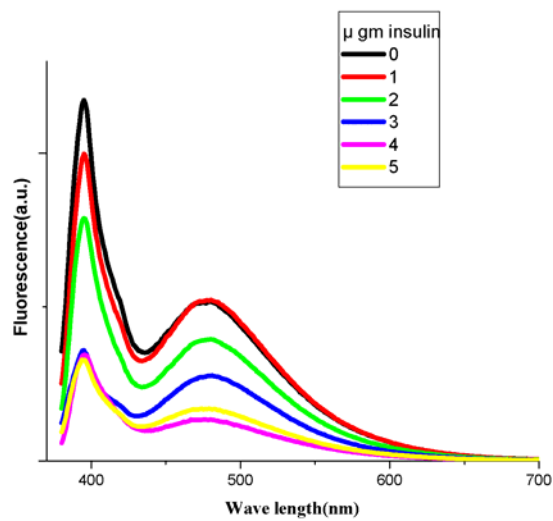

Figure S6: Emission spectra of gelator **5d**(0.05 % w/w) in the presence of insulin at various concentrations (excitation  $\lambda_{\text{max}} = 370$  nm).
